# Supplementary material for: Efficacy and Safety of Sugammadex for the Reversal of Rocuronium-Induced Neuromuscular Blockade in Patients with End-Stage Renal Disease: A Systematic Review and Meta-Analysis
Source: MDPI journal article supplement (doi:10.3390/medicina57111259), 2021-11-17
Supplement: s1 [file s1]

Table S1: Search strategies for each database

| No. | PubMed                                                                                                                                                                                             | Embase                                                                                                                                                                                     | Cochrane Library                                                                                                                                                             | Web of Science<br>(Including ESCI)                                                                                                                                                                                                     | Scopus                                                                                                                                                                                                                                           | KoreaMed                                                                                                                                                                         |
|-----|----------------------------------------------------------------------------------------------------------------------------------------------------------------------------------------------------|--------------------------------------------------------------------------------------------------------------------------------------------------------------------------------------------|------------------------------------------------------------------------------------------------------------------------------------------------------------------------------|----------------------------------------------------------------------------------------------------------------------------------------------------------------------------------------------------------------------------------------|--------------------------------------------------------------------------------------------------------------------------------------------------------------------------------------------------------------------------------------------------|----------------------------------------------------------------------------------------------------------------------------------------------------------------------------------|
| #1  | Renal Insufficiency[mesh:noexp] OR Acute Kidney Injury[mesh:noexp] OR Acute Kidney Tubular Necrosis[mesh:noexp] OR Chronic Renal Insufficiency[mesh:noexp] OR Chronic Kidney Failure[mesh:noexp]   | ('kidney failure'/de OR 'acute kidney failure'/exp OR 'acute kidney tubule necrosis'/exp OR 'kidney tubule necrosis'/exp OR 'chronic kidney failure'/exp OR 'end stage renal disease'/exp) | [mh ^"Renal Insufficiency"] OR [mh ^"Acute Kidney Injury"] OR [mh ^"Acute Kidney Tubular Necrosis"] OR [mh ^"Chronic Renal Insufficiency"] OR [mh ^"Chronic Kidney Failure"] | TS=("renal insufficienc*" OR "kidney insufficienc*" OR "kidney failur*" OR "renal failur*")                                                                                                                                            | TITLE-ABS-KEY("renal insufficienc*" OR "kidney insufficienc*" OR "kidney failur*" OR "renal failur*")                                                                                                                                            | renal OR kidney                                                                                                                                                                  |
| #2  | Renal insufficienc*[tiab] OR Kidney Insufficienc*[tiab] OR Kidney Failur*[tiab] OR Renal Failur*[tiab]                                                                                             | ('renal insufficienc*':ti,ab,kw OR 'kidney insufficienc*':ti,ab,kw OR 'kidney failur*':ti,ab,kw OR 'renal failur*':ti,ab,kw)                                                               | ('renal insufficienc*':ti,ab,kw OR "kidney insufficienc*":ti,ab,kw OR "kidney failur*":ti,ab,kw OR "renal failur*":ti,ab,kw)                                                 | TS=("acute kidney injur*" OR "acute renal injur*" OR "kidney acute failure*")                                                                                                                                                          | TITLE-ABS-KEY("acute kidney injur*" OR "acute renal injur*" OR "kidney acute failure*")                                                                                                                                                          | insufficiency OR insufficiencs OR failure OR failures OR injury OR injuries OR disease OR diseases OR disorder OR disorders OR necrosis OR necroses OR impairment OR impairments |
| #3  | Acute Kidney Injur*[tiab] OR Acute Renal Injur*[tiab] OR "Kidney acute failure"[tiab] OR "Kidney acute failures"[tiab]                                                                             | ('acute kidney injur*':ti,ab,kw OR 'acute renal injur*':ti,ab,kw OR 'kidney acute failure*':ti,ab,kw)                                                                                      | ('acute kidney injur*':ti,ab,kw OR "acute renal injur*":ti,ab,kw OR "kidney acute failure*":ti,ab,kw)                                                                        | TS=("lower nephron nephros*" OR "acute renal tubular failure*" OR "kidney tubular epithelium necrosis" OR "necrotic tubulonephros*" OR "renal tubular cell necrosis" OR "tubular necrosis" OR "tubule necrosis" OR "tubulus necrosis") | TITLE-ABS-KEY("lower nephron nephros*" OR "acute renal tubular failure*" OR "kidney tubular epithelium necrosis" OR "necrotic tubulonephros*" OR "renal tubular cell necrosis" OR "tubular necrosis" OR "tubule necrosis" OR "tubulus necrosis") | sugammadex OR rocuronium OR neuromuscular OR cyclodextrins OR bridion OR esmeron OR zenuron                                                                                      |
| #4  | "Lower Nephron Nephrosis"[tiab] OR "Lower nephron nephroses"[tiab] OR "acute renal tubular failure"[tiab] OR "acute renal tubular failures"[tiab] OR "kidney tubular epithelium necrosis"[tiab] OR | ('lower nephron nephros*':ti,ab,kw OR 'acute renal tubular failure*':ti,ab,kw OR 'kidney tubular epithelium necrosis*':ti,ab,kw OR 'renal tubular cell necrosis*':ti,ab,kw                 | ('lower nephron nephros*':ti,ab,kw OR "acute renal tubular failure*":ti,ab,kw OR "kidney tubular epithelium necrosis*":ti,ab,kw OR "necrotic tubulonephros*":ti,ab,kw        | TS=("chronic kidney disease*" OR "chronic renal disease*" OR "chronic kidney disorder*" OR "chronic nephropath*" OR "kidney chronic failure*" OR "chronic disease kidney                                                               | TITLE-ABS-KEY("chronic kidney disease*" OR "chronic renal disease*" OR "chronic kidney disorder*" OR "chronic nephropath*" OR "kidney chronic failure*" OR "chronic disease kidney                                                               | #1 AND #2 AND #3                                                                                                                                                                 |

|    |                                                                                                                                                                                                                                                                                                                                                                                                                                                        |                                                                                                                                                                                                                                                                                                                                                                                                                                                                                                               |                                                                                                                                                                                                                                                                                                                                                                                                                                                                                                                                 |                                                                                                                                                                                                                                                                                                                                                                                                                        |                                                                                                                                                                                                                                                                                                                                                                                                                                  |
|----|--------------------------------------------------------------------------------------------------------------------------------------------------------------------------------------------------------------------------------------------------------------------------------------------------------------------------------------------------------------------------------------------------------------------------------------------------------|---------------------------------------------------------------------------------------------------------------------------------------------------------------------------------------------------------------------------------------------------------------------------------------------------------------------------------------------------------------------------------------------------------------------------------------------------------------------------------------------------------------|---------------------------------------------------------------------------------------------------------------------------------------------------------------------------------------------------------------------------------------------------------------------------------------------------------------------------------------------------------------------------------------------------------------------------------------------------------------------------------------------------------------------------------|------------------------------------------------------------------------------------------------------------------------------------------------------------------------------------------------------------------------------------------------------------------------------------------------------------------------------------------------------------------------------------------------------------------------|----------------------------------------------------------------------------------------------------------------------------------------------------------------------------------------------------------------------------------------------------------------------------------------------------------------------------------------------------------------------------------------------------------------------------------|
|    | "necrotic tubulonephrosis"[tiab] OR "renal tubular cell necrosis"[tiab] OR tubular necrosis[tiab] OR tubule necrosis[tiab] OR tubulus necrosis[tiab]                                                                                                                                                                                                                                                                                                   | OR 'tubular necrosis':ti,ab,kw OR 'tubule necrosis':ti,ab,kw OR 'tubulus necrosis':ti,ab,kw)                                                                                                                                                                                                                                                                                                                                                                                                                  | cell necrosis":ti,ab,kw OR "tubular necrosis":ti,ab,kw OR "tubule necrosis":ti,ab,kw OR "tubulus necrosis":ti,ab,kw)                                                                                                                                                                                                                                                                                                                                                                                                            | diseases kidney function")                                                                                                                                                                                                                                                                                                                                                                                             | function" OR "chronic diseases kidney function")                                                                                                                                                                                                                                                                                                                                                                                 |
|    |                                                                                                                                                                                                                                                                                                                                                                                                                                                        |                                                                                                                                                                                                                                                                                                                                                                                                                                                                                                               |                                                                                                                                                                                                                                                                                                                                                                                                                                                                                                                                 | TS=("end stage kidney disease*" OR "end stage renal disease*" OR "end stage kidney failure*" OR "end stage renal dysfunction*" OR "end stage renal failure*" OR "end stage renal impairment*" OR "end stage renal insufficienc*" OR "end-stage kidney disease" OR "end-stage kidney failure" OR "end-stage renal disease" OR "end-stage renal failure" OR esrd OR "stage 5 kidney disease" OR "stage 5 renal disease") | TITLE-ABS-KEY("end stage kidney disease*" OR "end stage renal disease*" OR "end stage kidney failure*" OR "end stage renal dysfunction*" OR "end stage renal failure*" OR "end stage renal impairment*" OR "end stage renal insufficienc*" OR "end-stage kidney disease" OR "end-stage kidney failure" OR "end-stage renal disease" OR "end-stage renal failure" OR esrd OR "stage 5 kidney disease" OR "stage 5 renal disease") |
| #5 | Chronic Kidney Disease*[tiab] OR Chronic Renal Disease*[tiab] OR chronic kidney disorder*[tiab] OR chronic nephropath*[tiab] OR "kidney chronic failure"[tiab] OR "Kidney chronic failures"[tiab] OR "chronic disease kidney function"[tiab] OR "chronic diseases kidney function"[tiab]                                                                                                                                                               | ('chronic kidney disease*':ti,ab,kw OR 'chronic renal disease*':ti,ab,kw OR 'chronic kidney disorder*':ti,ab,kw OR 'chronic nephropath*':ti,ab,kw OR 'kidney chronic failure*':ti,ab,kw OR 'chronic disease kidney function':ti,ab,kw OR 'chronic diseases kidney function':ti,ab,kw)                                                                                                                                                                                                                         | ("chronic kidney disease*":ti,ab,kw OR "chronic renal disease*":ti,ab,kw OR "chronic kidney disorder*":ti,ab,kw OR "chronic nephropath*":ti,ab,kw OR "kidney chronic failure*":ti,ab,kw OR "chronic disease kidney function":ti,ab,kw OR "chronic diseases kidney function":ti,ab,kw)                                                                                                                                                                                                                                           |                                                                                                                                                                                                                                                                                                                                                                                                                        |                                                                                                                                                                                                                                                                                                                                                                                                                                  |
|    | end stage kidney disease*[tiab] OR end stage renal disease*[tiab] OR end stage kidney failure*[tiab] OR end stage renal dysfunction*[tiab] OR end stage renal failure*[tiab] OR end stage renal impairment*[tiab] OR end stage renal insufficienc*[tiab] OR "end-stage kidney disease"[tiab] OR "end-stage kidney failure"[tiab] OR "end-stage renal disease"[tiab] OR "end-stage renal failure"[tiab] OR ESRD[tiab] OR "stage 5 kidney disease"[tiab] | ('end stage kidney disease*':ti,ab,kw OR 'end stage renal disease*':ti,ab,kw OR 'end stage kidney failure*':ti,ab,kw OR 'end stage renal dysfunction*':ti,ab,kw OR 'end stage renal failure*':ti,ab,kw OR 'end stage renal impairment*':ti,ab,kw OR 'end stage renal insufficienc*':ti,ab,kw OR 'end-stage kidney disease':ti,ab,kw OR 'end-stage kidney failure':ti,ab,kw OR 'end-stage renal disease':ti,ab,kw OR 'end-stage renal failure':ti,ab,kw OR esrd:ti,ab,kw OR 'stage 5 kidney disease':ti,ab,kw) | ("end stage kidney disease*":ti,ab,kw OR "end stage renal disease*":ti,ab,kw OR "end stage kidney failure*":ti,ab,kw OR "end stage renal dysfunction*":ti,ab,kw OR "end stage renal failure*":ti,ab,kw OR "end stage renal impairment*":ti,ab,kw OR "end stage renal insufficienc*":ti,ab,kw OR "end-stage kidney disease":ti,ab,kw OR "end-stage kidney failure":ti,ab,kw OR "end-stage renal disease":ti,ab,kw OR "end-stage renal failure":ti,ab,kw OR "stage 5 renal failure":ti,ab,kw OR "stage 5 renal disease":ti,ab,kw) | #1 OR #2 OR #3 OR #4#1 OR #2 OR #3 OR #4 OR #5                                                                                                                                                                                                                                                                                                                                                                         | #1 OR #2 OR #3 OR #4 OR #5                                                                                                                                                                                                                                                                                                                                                                                                       |
| #6 | impairment*[tiab] OR end stage renal insufficienc*[tiab] OR "end-stage kidney disease"[tiab] OR "end-stage kidney failure"[tiab] OR "end-stage renal disease"[tiab] OR "end-stage renal failure"[tiab] OR ESRD[tiab] OR "stage 5 kidney disease"[tiab]                                                                                                                                                                                                 | impairment*':ti,ab,kw OR 'end stage renal insufficienc*':ti,ab,kw OR 'end-stage kidney disease':ti,ab,kw OR 'end-stage kidney failure':ti,ab,kw OR 'end-stage renal disease':ti,ab,kw OR 'end-stage renal failure':ti,ab,kw OR esrd:ti,ab,kw OR 'stage 5 kidney disease':ti,ab,kw)                                                                                                                                                                                                                            | "end stage renal impairment*":ti,ab,kw OR "end stage renal insufficienc*":ti,ab,kw OR "end-stage kidney disease":ti,ab,kw OR "end-stage kidney failure":ti,ab,kw OR "end-stage renal disease":ti,ab,kw OR "end-stage renal failure":ti,ab,kw OR "stage 5 renal failure":ti,ab,kw OR "stage 5 renal disease":ti,ab,kw)                                                                                                                                                                                                           |                                                                                                                                                                                                                                                                                                                                                                                                                        |                                                                                                                                                                                                                                                                                                                                                                                                                                  |

|     |                                                                                                                                                                                                                                                                                                                                                                     |                                                                                                                                                                                                                                            |                                                                                                                                                                                                                                            |                                                                                                                                                                                                                                                               |                                                                                                                                                                                                                                                     |
|-----|---------------------------------------------------------------------------------------------------------------------------------------------------------------------------------------------------------------------------------------------------------------------------------------------------------------------------------------------------------------------|--------------------------------------------------------------------------------------------------------------------------------------------------------------------------------------------------------------------------------------------|--------------------------------------------------------------------------------------------------------------------------------------------------------------------------------------------------------------------------------------------|---------------------------------------------------------------------------------------------------------------------------------------------------------------------------------------------------------------------------------------------------------------|-----------------------------------------------------------------------------------------------------------------------------------------------------------------------------------------------------------------------------------------------------|
|     | OR "stage 5 renal disease"[tiab]                                                                                                                                                                                                                                                                                                                                    | disease':ti,ab,kw OR 'stage 5 renal disease':ti,ab,kw)                                                                                                                                                                                     | esrd:ti,ab,kw OR "stage 5 kidney disease":ti,ab,kw OR "stage 5 renal disease":ti,ab,kw)                                                                                                                                                    |                                                                                                                                                                                                                                                               |                                                                                                                                                                                                                                                     |
| #7  | #1 OR #2 OR #3 OR #4 OR #5 OR #6                                                                                                                                                                                                                                                                                                                                    | #1 OR #2 OR #3 OR #4 OR #5 OR #6                                                                                                                                                                                                           | #1 OR #2 OR #3 OR #4 OR #5 OR #6                                                                                                                                                                                                           | TS=("neuromuscular block*" OR "myoneural blockade" OR "nerve muscle block" OR "neuromuscular inhibition" OR "neuromuscular receptor blocking" OR "neuromuscular transmission blocking")                                                                       | TITLE-ABS-KEY("neuromuscular block*" OR "myoneural blockade" OR "nerve muscle block" OR "neuromuscular inhibition" OR "neuromuscular receptor blocking" OR "neuromuscular transmission blocking")                                                   |
| #8  | Neuromuscular Blockade[mesh] OR Sugammadex OR gamma-Cyclodextrins[mesh] OR rocuronium Neuromuscular blockade[tiab] OR Neuromuscular Block[tiab] OR neuromuscular blocking[tiab] OR myoneural blockade[tiab] OR nerve muscle block[tiab] OR neuromuscular inhibition[tiab] OR "neuromuscular receptor blocking"[tiab] OR "neuromuscular transmission blocking"[tiab] | ('neuromuscular blocking'/exp OR 'sugammadex'/exp OR 'gamma cyclodextrin derivative'/exp OR 'rocuronium'/exp)                                                                                                                              | [mh "Neuromuscular Blockade"] OR Sugammadex OR [mh "gamma-Cyclodextrins"] OR rocuronium                                                                                                                                                    | TS=("gamma-cyclodextrins" OR "gamma cyclodextrins")                                                                                                                                                                                                           | TITLE-ABS-KEY("gamma-cyclodextrins" OR "gamma cyclodextrins")                                                                                                                                                                                       |
| #9  | Neuromuscular Block[tiab] OR neuromuscular blocking[tiab] OR myoneural blockade[tiab] OR nerve muscle block[tiab] OR neuromuscular inhibition[tiab] OR "neuromuscular receptor blocking"[tiab] OR "neuromuscular transmission blocking"[tiab]                                                                                                                       | ('neuromuscular block*':ti,ab,kw OR 'myoneural blockade':ti,ab,kw OR 'nerve muscle block':ti,ab,kw OR 'neuromuscular inhibition':ti,ab,kw OR 'neuromuscular receptor blocking':ti,ab,kw OR 'neuromuscular transmission blocking':ti,ab,kw) | ("neuromuscular block*":ti,ab,kw OR "myoneural blockade":ti,ab,kw OR "nerve muscle block":ti,ab,kw OR "neuromuscular inhibition":ti,ab,kw OR "neuromuscular receptor blocking":ti,ab,kw OR "neuromuscular transmission blocking":ti,ab,kw) | TS=("6-perdeoxy-6-per(2-carboxyethyl)thio-gamma-cyclodextrin sodium salt" OR bridion OR "org 25969" OR org25969)                                                                                                                                              | TITLE-ABS-KEY("6-perdeoxy-6-per(2-carboxyethyl)thio-gamma-cyclodextrin sodium salt" OR bridion OR "org 25969" OR org25969)                                                                                                                          |
| #10 | "gamma-Cyclodextrins" OR "gamma Cyclodextrins"                                                                                                                                                                                                                                                                                                                      | ('gamma-cyclodextrins' OR 'gamma cyclodextrins')                                                                                                                                                                                           | ("gamma-cyclodextrins" OR "gamma cyclodextrins")                                                                                                                                                                                           | TS=("1-(17-(acetoyl)-3-hydroxy-2-(4-morpholinyl)androsta n-16-yl)-1-(2-propenyl)pyrrolidini um" OR rocuronium OR "pyrrolidinium, 1-((2beta,3alpha,5alpha,16beta,17beta)-17-(acetyloxy)-3-hydroxy-2-(4-morpholinyl)androsta n-16-yl)-1-(2-propenyl)-, bromide" | TITLE-ABS-KEY("1-(17-(acetoyl)-3-hydroxy-2-(4-morpholinyl)androsta n-16-yl)-1-(2-propenyl)pyrrolidini um" OR rocuronium OR "pyrrolidinium, 1-((2beta,3alpha,5alpha,16beta,17beta)-17-(acetyloxy)-3-hydroxy-2-(4-morpholinyl)androsta n-16-yl)-1-(2- |

|     |                                                                                                                                                                                                                                                                                                                                                                                                                                                                                                                                  |                                                                                                                                                                                                                                                                                                                                                                                                                                                                                                                 | OR esmeron OR<br>esmerone OR "org<br>9426" OR org9426 OR<br>zemuron)                                                                                                                                                                                                                                                                                                                                                                                                                                            | propenyl)-, bromide"<br>OR esmeron OR<br>esmerone OR "org<br>9426" OR org9426 OR<br>zemuron) |                          |
|-----|----------------------------------------------------------------------------------------------------------------------------------------------------------------------------------------------------------------------------------------------------------------------------------------------------------------------------------------------------------------------------------------------------------------------------------------------------------------------------------------------------------------------------------|-----------------------------------------------------------------------------------------------------------------------------------------------------------------------------------------------------------------------------------------------------------------------------------------------------------------------------------------------------------------------------------------------------------------------------------------------------------------------------------------------------------------|-----------------------------------------------------------------------------------------------------------------------------------------------------------------------------------------------------------------------------------------------------------------------------------------------------------------------------------------------------------------------------------------------------------------------------------------------------------------------------------------------------------------|----------------------------------------------------------------------------------------------|--------------------------|
| #11 | "6-perdeoxy-6-per(2-<br>carboxyethyl)thio-<br>gamma-cyclodextrin<br>sodium salt" OR<br>Bridion OR "Org<br>25969" OR Org25969<br>"1-(17-(acetoxy)-3-<br>hydroxy-2-(4-<br>morpholinyl)androsta<br>n-16-yl)-1-(2-<br>propenyl)pyrrolidiniu<br>m" OR rocuronium<br>OR "pyrrolidinium, 1-<br>((2beta,3alpha,5alpha,<br>16beta,17beta)-17-<br>(acetyloxy)-3-<br>hydroxy-2-(4-<br>morpholinyl)androsta<br>n-16-yl)-1-(2-<br>propenyl)-, bromide"<br>OR Esmeron OR<br>Esmerone OR ORG-<br>9426 OR "ORG 9426"<br>OR Org9426 OR<br>Zemuron | ('6-perdeoxy-6-per(2-<br>carboxyethyl)thio-<br>gamma-cyclodextrin<br>sodium salt' OR<br>bridion OR 'org 25969'<br>OR org25969)<br>'1-(17-(acetoxy)-3-<br>hydroxy-2-(4-<br>morpholinyl)androsta<br>n-16-yl)-1-(2-<br>propenyl)pyrrolidiniu<br>m' OR rocuronium OR<br>'pyrrolidinium, 1-<br>((2beta,3alpha,5alpha,16beta,17beta)-17-<br>(acetyloxy)-3-hydroxy-<br>2-(4-<br>morpholinyl)androsta<br>n-16-yl)-1-(2-<br>propenyl)-, bromide'<br>OR esmeron OR<br>esmerone OR 'org<br>9426' OR org9426 OR<br>zemuron) | ("6-perdeoxy-6-per(2-<br>carboxyethyl)thio-<br>gamma-cyclodextrin<br>sodium salt" OR<br>bridion OR "org<br>25969" OR org25969)<br>'1-(17-(acetoxy)-3-<br>hydroxy-2-(4-<br>morpholinyl)androsta<br>n-16-yl)-1-(2-<br>propenyl)pyrrolidini<br>um" OR rocuronium<br>OR "pyrrolidinium, 1-<br>((2beta,3alpha,5alpha,16beta,17beta)-17-<br>(acetyloxy)-3-<br>hydroxy-2-(4-<br>morpholinyl)androsta<br>n-16-yl)-1-(2-<br>propenyl)-, bromide"<br>OR esmeron OR<br>esmerone OR "org<br>9426" OR org9426 OR<br>zemuron) | #7 OR #8 OR #9 OR<br>#10                                                                     | #7 OR #8 OR #9 OR<br>#10 |
| #12 |                                                                                                                                                                                                                                                                                                                                                                                                                                                                                                                                  |                                                                                                                                                                                                                                                                                                                                                                                                                                                                                                                 |                                                                                                                                                                                                                                                                                                                                                                                                                                                                                                                 | #6 AND #11                                                                                   | #6 AND #11               |
| #13 | #8 OR #9 OR #10 OR<br>#11 OR #12                                                                                                                                                                                                                                                                                                                                                                                                                                                                                                 | #8 OR #9 OR #10 OR<br>#11 OR #12                                                                                                                                                                                                                                                                                                                                                                                                                                                                                | #8 OR #9 OR #10 OR<br>#11 OR #12                                                                                                                                                                                                                                                                                                                                                                                                                                                                                |                                                                                              |                          |
| #14 | #7 AND #13                                                                                                                                                                                                                                                                                                                                                                                                                                                                                                                       | #7 AND #13                                                                                                                                                                                                                                                                                                                                                                                                                                                                                                      | #7 AND #13                                                                                                                                                                                                                                                                                                                                                                                                                                                                                                      |                                                                                              |                          |
| #15 | (Animals[mh] NOT<br>Humans[mh]) OR<br>Models,<br>Animal[mh:noexp]<br>OR Disease Models,<br>Animal[mh] OR<br>Animal<br>Experimentation[mh]                                                                                                                                                                                                                                                                                                                                                                                        | (animal/exp NOT<br>human/exp) OR<br>'animal model'/exp OR<br>'animal<br>experiment'/exp OR<br>'animal cell'/de OR<br>'animal tissue'/de OR<br>'in vitro study'/de OR<br>'nonhuman'/de                                                                                                                                                                                                                                                                                                                           |                                                                                                                                                                                                                                                                                                                                                                                                                                                                                                                 |                                                                                              |                          |
| #16 | #14 NOT #15                                                                                                                                                                                                                                                                                                                                                                                                                                                                                                                      | #14 NOT #15                                                                                                                                                                                                                                                                                                                                                                                                                                                                                                     |                                                                                                                                                                                                                                                                                                                                                                                                                                                                                                                 |                                                                                              |                          |

Table S2. Summary of this review

|                                                                                                                                       |
|---------------------------------------------------------------------------------------------------------------------------------------|
| ESRD patients’ changes in this review                                                                                                 |
| Delayed recovery to a TOF ratio of 0.9                                                                                                |
| Decreased clearances of both rocuronium and sugammadex                                                                                |
| Increased remaining plasma concentrations of both rocuronium and sugammadex                                                           |
| No changes on the incidence of recurrence of NMB, inadequate recovery of neuromuscular function                                       |
| Longer retention time of sugammadex-rocuronium complex, but effectively removed through hemodialysis within 24-48 hours after surgery |
